# Supplementary material for: Comprehensive two-step supercritical fluid extraction for green isolation of volatiles and phenolic compounds from plant material
Source: Royal Society of Chemistry journal article supplement (doi:10.1039/d4gc00371c), 2024-01-01
Supplement: d4gc00371c1.pdf [file d4gc00371c1.pdf]

## Supplementary Information

### **Comprehensive Two-Step Supercritical Fluid Extraction for Green Isolation of Volatiles and Phenolic Compounds from Plant Material**

Veronika Pilařová, Kateřina Plachká, Diana Herbsová, Štefan Kosturko, Frantisek Svec, Lucie Nováková\*

Department of Analytical Chemistry, Faculty of Pharmacy in Hradec Králové, Charles University, Heyrovského 1203, 500 05 Hradec Králové, Czech Republic

\* Email: nol@email.cz (Lucie Nováková)

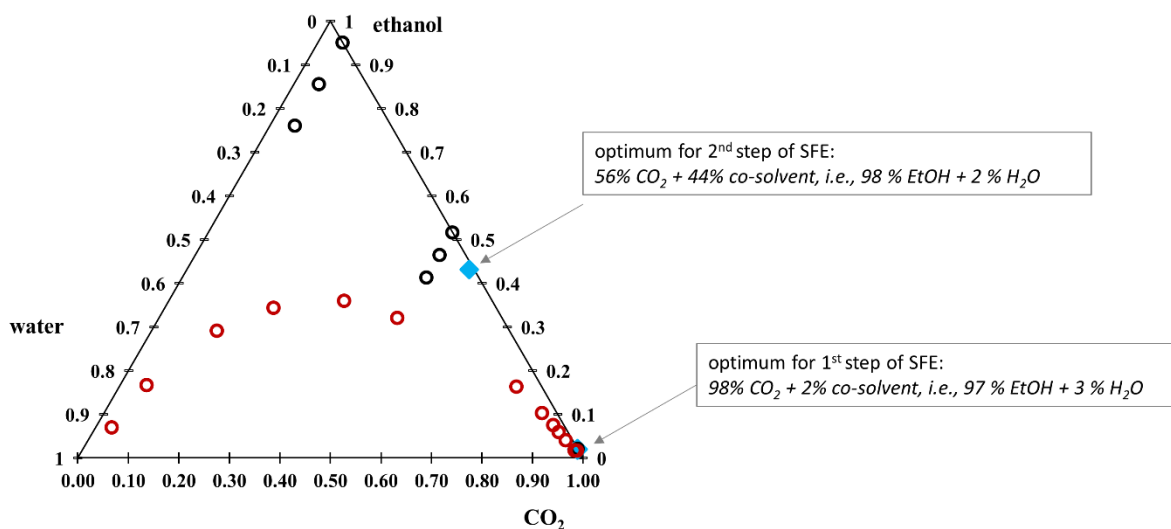

**Figure S1: Phase diagram of a ternary system composed of CO<sub>2</sub>/EtOH/H<sub>2</sub>O.<sup>1</sup> The red circles mark the bubble point/dew point curve, i.e., the boundary between a single liquid phase (above the curve) and two phases (vapor/liquid) at 60 °C and 142 bar. The black circles mark the conditions investigated within the method optimization. The blue squares mark the optimal conditions for individual steps of optimized methods.**

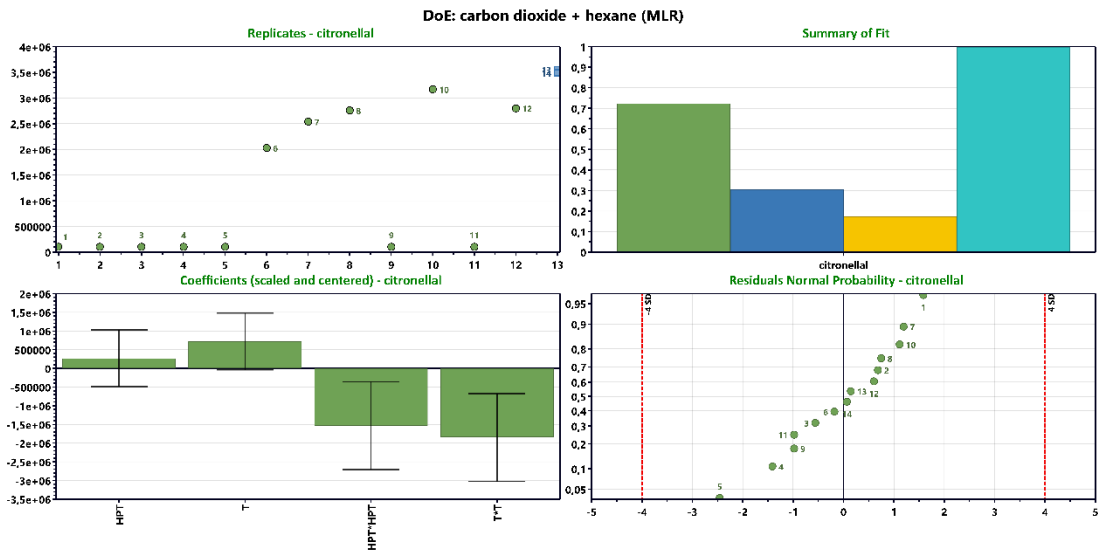

Figure S2: Model summary for by CO<sub>2</sub>/hexane extracted citronellal.

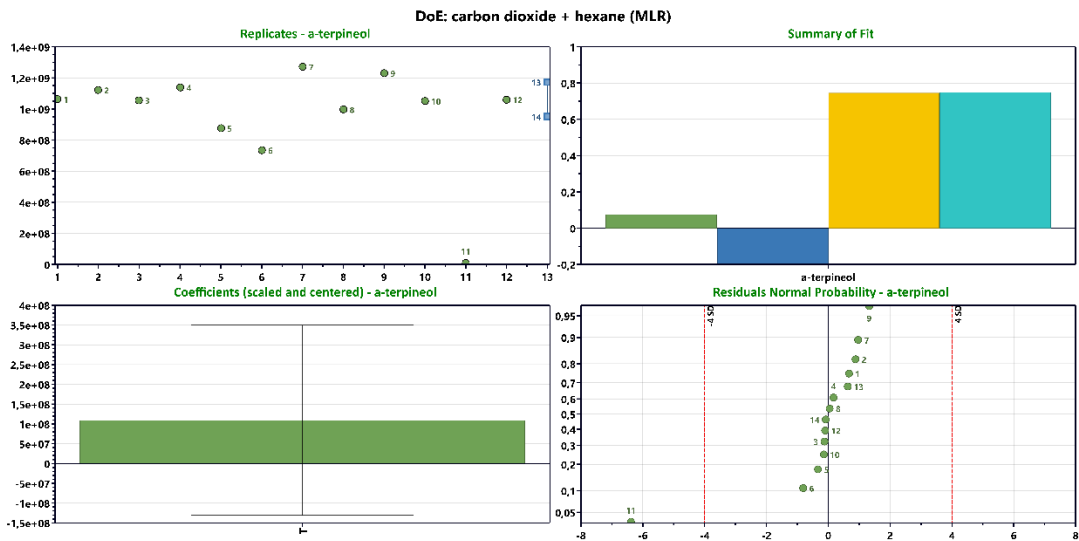

Figure S3: Model summary for terpineol extracted by CO<sub>2</sub>/hexane.

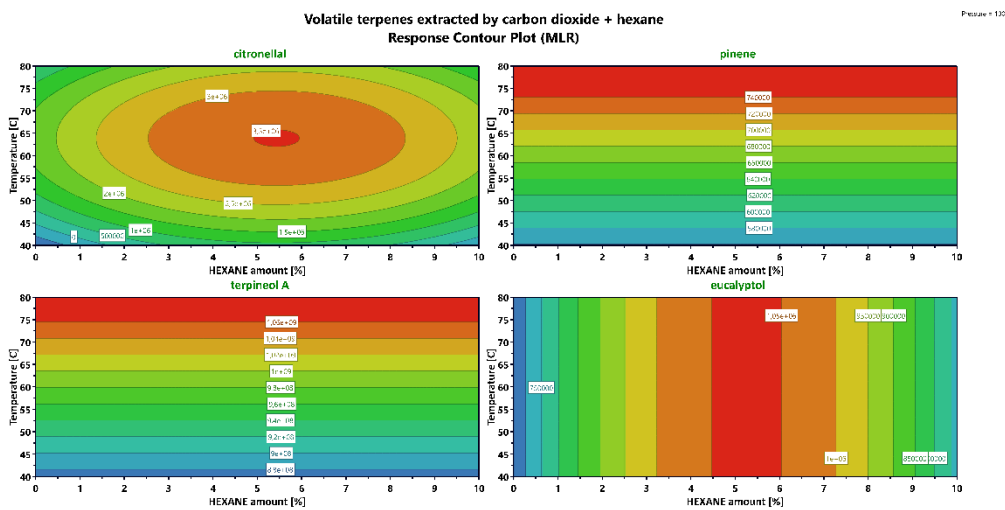

Figure S4: Response contour plot (MLR), volatile terpenes extracted by CO<sub>2</sub>/hexane.

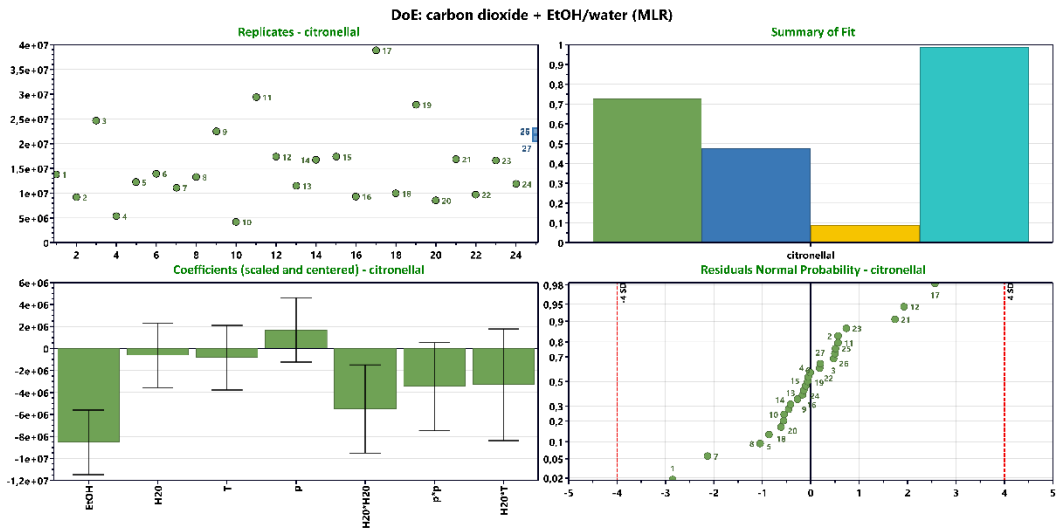

Figure S5: Model summary for citronellal extracted by CO<sub>2</sub>/EtOH/H<sub>2</sub>O.

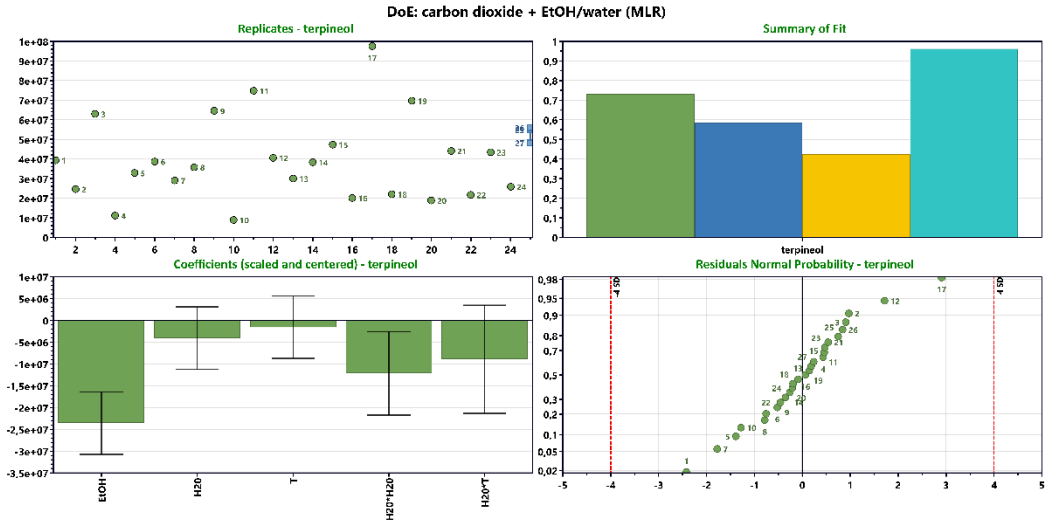

Figure S6: Model summary for terpineol extracted by CO<sub>2</sub>/EtOH/H<sub>2</sub>O

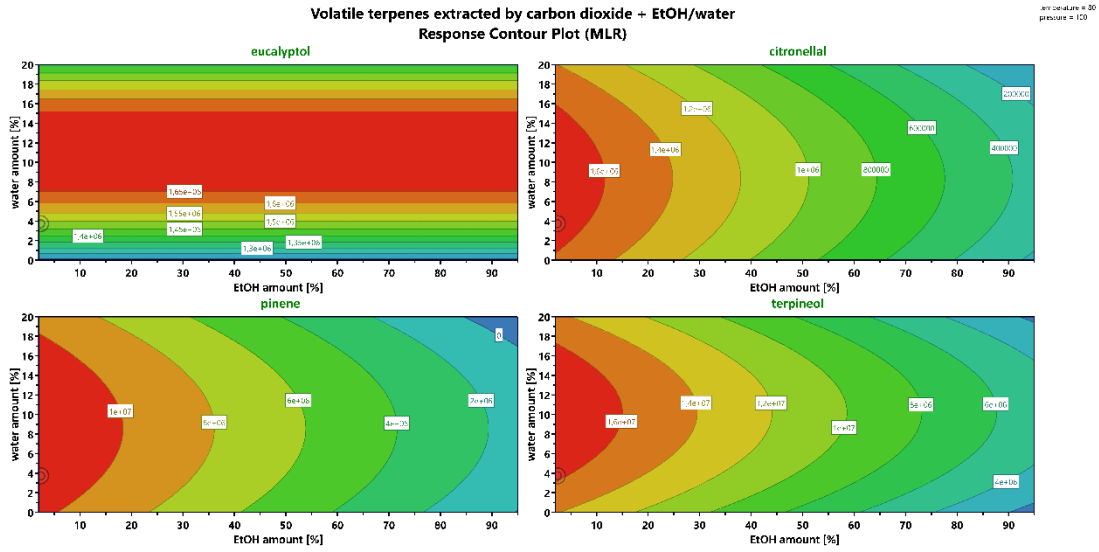

Figure S7: Response contour plot (MLR), volatile terpenes extracted by CO<sub>2</sub>/EtOH/H<sub>2</sub>O.

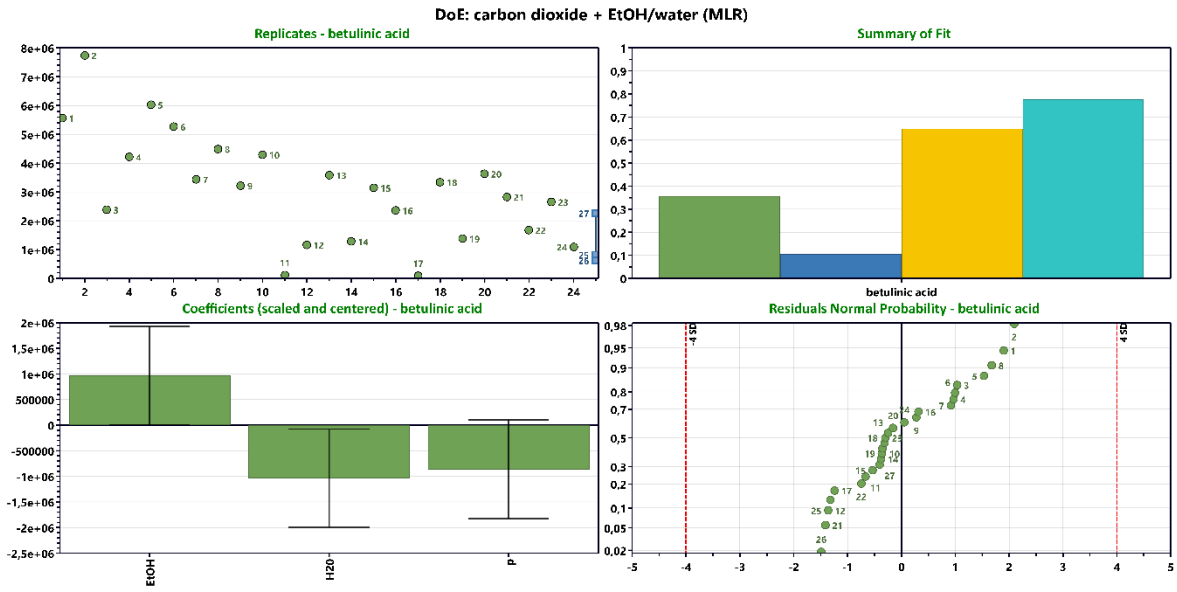

Figure S8: Model summary for betulinic acid extracted with CO<sub>2</sub>/EtOH/H<sub>2</sub>O.

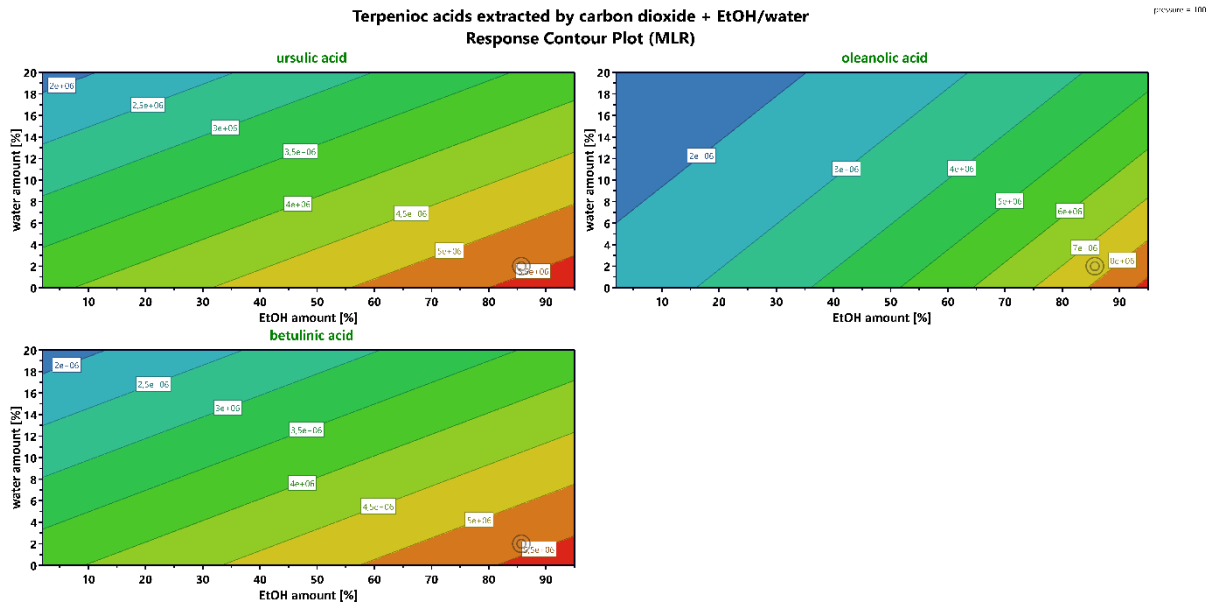

Figure S9: Response contour plot (MLR), terpenic acids extracted by CO<sub>2</sub>/EtOH/H<sub>2</sub>O.

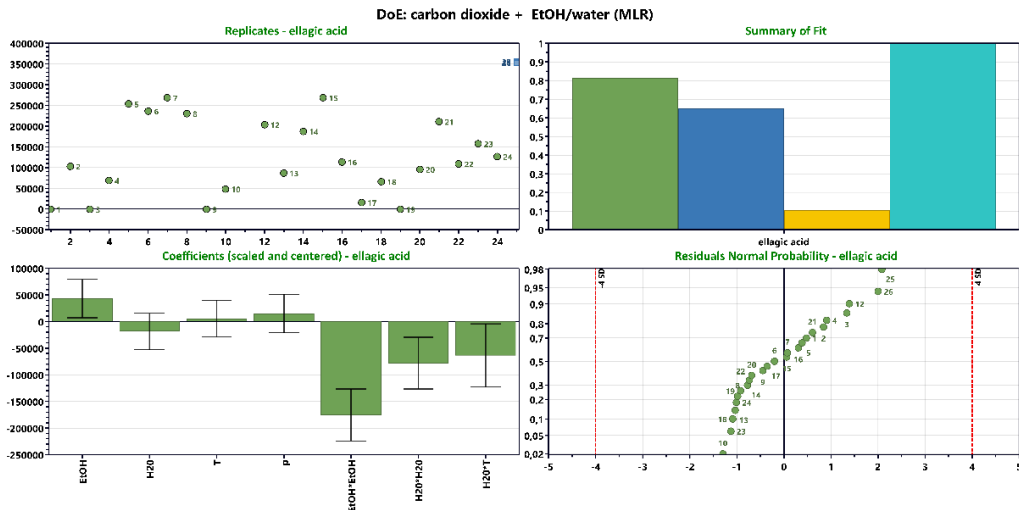

Figure S10: Model summary for ellagic acid extracted with CO<sub>2</sub>/EtOH/H<sub>2</sub>O.

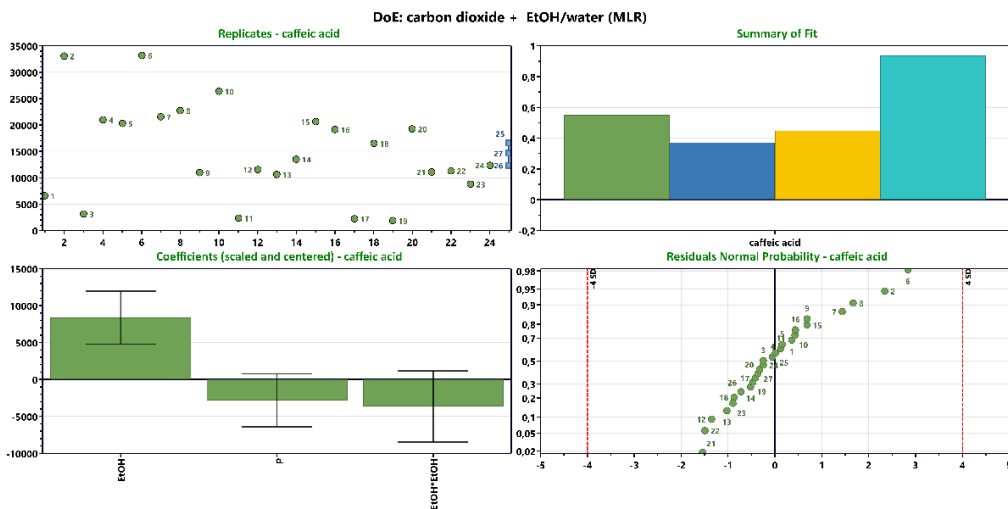

Figure S11: Model summary for caffeic acid extracted with CO<sub>2</sub>/EtOH/H<sub>2</sub>O.

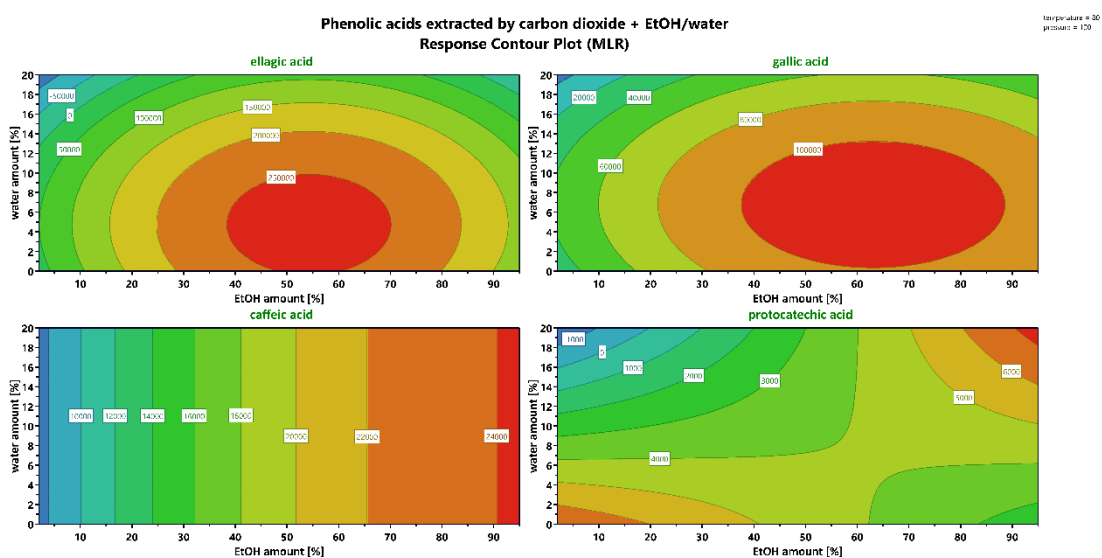

Figure S12: Response contour plot (MLR), phenolic acids extracted by CO<sub>2</sub>/EtOH/H<sub>2</sub>O.

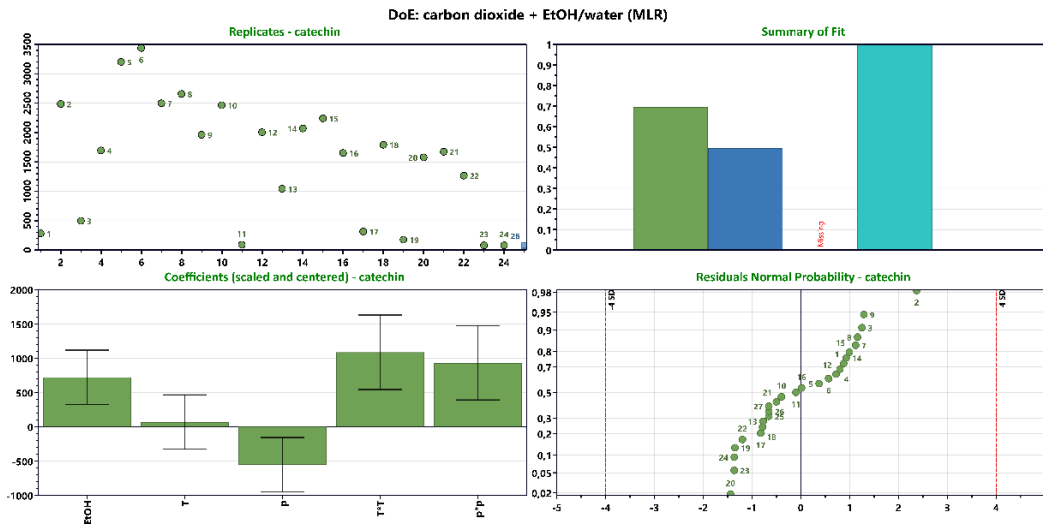

Figure S13: Model summary for catechin extracted with CO<sub>2</sub>/EtOH/H<sub>2</sub>O.

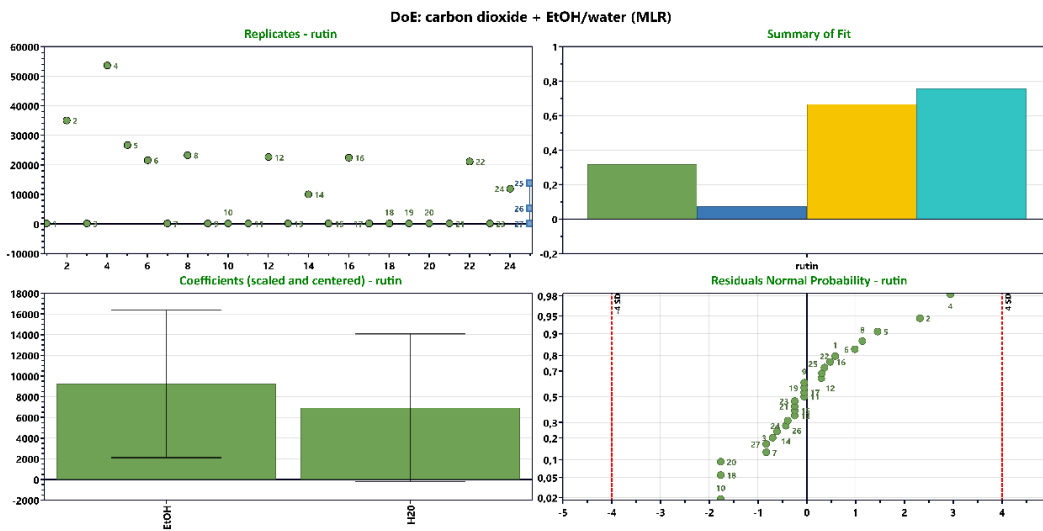

Figure S14: Model summary for rutin extracted with CO<sub>2</sub>/EtOH/H<sub>2</sub>O.

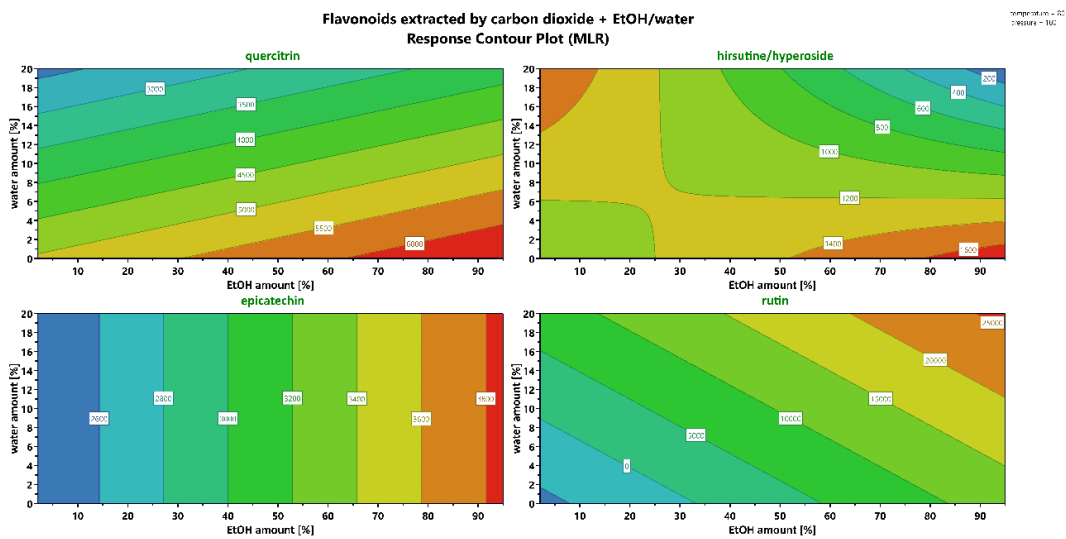

Figure S15: Response contour plot (MLR), flavonoids extracted with CO<sub>2</sub>/EtOH/H<sub>2</sub>O

# AGREEprep

Analytical Greenness Metric  
for Sample Preparation

18/12/2023 12:06:01

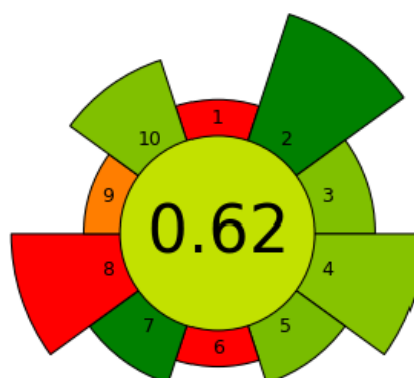

| #   | Criterion                                                                                  | Score | Weight |
|-----|--------------------------------------------------------------------------------------------|-------|--------|
| 1.  | <b>Sample preparation placement</b>                                                        | 0.0   | 1      |
|     | Sample preparation placement: Ex situ                                                      |       |        |
| 2.  | <b>Hazardous materials</b>                                                                 | 1.0   | 5      |
|     | Mass [g] or volume [mL] of problematic materials: 0                                        |       |        |
| 3.  | <b>Sustainability, renewability, and reusability of materials</b>                          | 0.75  | 2      |
|     | > 75% of reagents and materials are sustainable or renewable                               |       |        |
| 4.  | <b>Waste</b>                                                                               | 0.74  | 4      |
|     | Mass [g] or volume [mL] of waste: 0.5                                                      |       |        |
| 5.  | <b>Size economy of the sample</b>                                                          | 0.77  | 2      |
|     | Mass [g] or volume [mL] of the sample: 0.5                                                 |       |        |
| 6.  | <b>Sample throughput</b>                                                                   | 0.0   | 1      |
|     | Hourly sample throughput: 1                                                                |       |        |
| 7.  | <b>Integration and automation</b>                                                          | 1.0   | 2      |
|     | No. of sample prep. steps: 2 steps or fewer; degree of automation: Fully automated systems |       |        |
| 8.  | <b>Energy consumption</b>                                                                  | 0.0   | 4      |
|     | Approximate energy consumption per analysis [W]: 11813                                     |       |        |
| 9.  | <b>Post-sample preparation configuration for analysis</b>                                  | 0.25  | 1      |
|     | Liquid chromatography, gas chromatography with quadrupole detection, etc.                  |       |        |
| 10. | <b>Operator's safety</b>                                                                   | 0.75  | 3      |
|     | No. of distinct hazards: 1 hazard                                                          |       |        |

Figure S16: AGREEprep report.



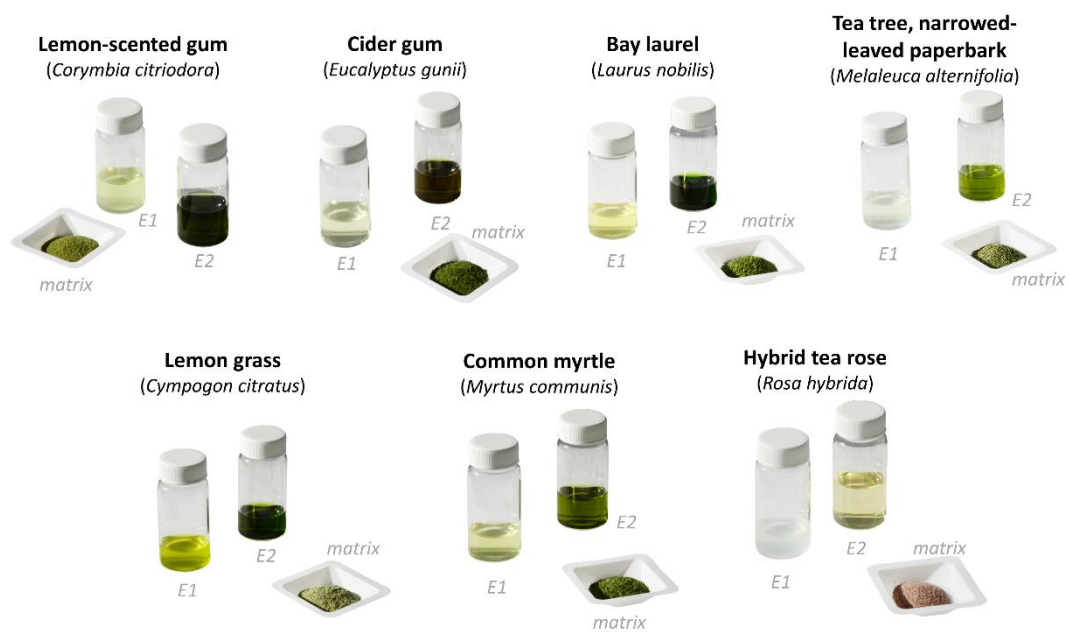

**Figure S17: Summary of plant samples, including their botanical name, plant homogenized matrix, and extracts from step 1 (E1) and step 2 (E2) using the optimal conditions listed in the Experimental section.**

**Table S1: List of analytes, including vendor, purity, and physicochemical properties. Summary formula, LogP, and pKa were obtained from the SciFinder database. Structure and exact mass were obtained using ChemDraw software.**

| ANALYTE                         | VENDOR        | PURITY [%] | FORMULA                                        | EXACT MASS [DA] | LOG P       | PKA        | STRUCTURE                                                                             | SOLVENT |
|---------------------------------|---------------|------------|------------------------------------------------|-----------------|-------------|------------|---------------------------------------------------------------------------------------|---------|
| <b>1,8-CINEOLE (EUCALYPTOL)</b> | Sigma-Aldrich | 99.3       | C <sub>10</sub> H <sub>18</sub> O              | 154.1358        | 2.795±0.267 | N/A        | 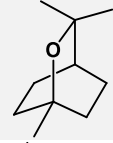   | EtOH    |
| <b>CITRAL</b>                   | Sigma-Aldrich | ≥ 97       | C <sub>10</sub> H <sub>16</sub> O              | 152.1201        | 3.127±0.359 | N/A        |    | EtOH    |
| <b>CITRONELLAL</b>              | Sigma-Aldrich | 95.9       | C <sub>10</sub> H <sub>18</sub> O              | 154.1358        | 3.297±0.259 | N/A        |    | EtOH    |
| <b>CITRONELLOL</b>              | Sigma-Aldrich | 99.5       | C <sub>10</sub> H <sub>20</sub> O              | 156.1514        | 3.239±0.235 | 15.13±0.10 |    | EtOH    |
| <b>EUGENOL</b>                  | Sigma-Aldrich | 99.7       | C <sub>10</sub> H <sub>12</sub> O <sub>2</sub> | 164.0837        | 2.403±0.236 | 10.29±0.18 |    | EtOH    |
| <b>FENCHONE</b>                 | Sigma-Aldrich | ≥ 99.5     | C <sub>10</sub> H <sub>16</sub> O              | 152.1201        | 2.089±0.300 | N/A        |   | EtOH    |
| <b>GERANIOL</b>                 | Sigma-Aldrich | 98.7       | C <sub>10</sub> H <sub>18</sub> O              | 154.1358        | 2.942±0.271 | 14.45±0.10 |  | EtOH    |
| <b>GERANYL ACETATE</b>          | Sigma-Aldrich | 98.3       | C <sub>12</sub> H <sub>20</sub> O <sub>2</sub> | 196.1463        | 3.904±0.315 | N/A        |  | EtOH    |
| <b>LIMONENE</b>                 | Sigma-Aldrich | 99.5       | C <sub>10</sub> H <sub>16</sub>                | 136.1252        | 4.552±0.241 | N/A        |  | EtOH    |
| <b>LINALOOL</b>                 | Sigma-Aldrich | 98.9       | C <sub>10</sub> H <sub>18</sub> O              | 154.1358        | 2.795±0.263 | 14.51±0.29 |  | EtOH    |

| ANALYTE                      | VENDOR        | PURITY [%] | FORMULA                                        | EXACT MASS [DA] | LOG P       | PKA        | STRUCTURE                                                                             | SOLVENT |
|------------------------------|---------------|------------|------------------------------------------------|-----------------|-------------|------------|---------------------------------------------------------------------------------------|---------|
| MENTHOL                      | Sigma-Aldrich | 99.3       | C <sub>10</sub> H <sub>20</sub> O              | 156.1514        | 3.216±0.204 | 15.30±0.60 | 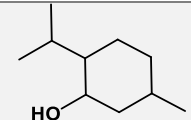   | EtOH    |
| NEROLIDOL<br>(MIXTURE A + B) | Sigma-Aldrich | 99.3       | C <sub>15</sub> H <sub>26</sub> O              | 222.1984        | 4.682±0.295 | 14.44±0.29 |    | EtOH    |
| P-CYMENE                     | Sigma-Aldrich | 99.7       | C <sub>10</sub> H <sub>14</sub>                | 134.1096        | 4.014±0.189 | N/A        |    | EtOH    |
| T-TERPIN                     | Sigma-Aldrich | 99.5       | C <sub>7</sub> H <sub>14</sub> O               | 114.1045        | 1.056±0.242 | 15.18±0.29 |    | EtOH    |
| A-PINENE                     | Sigma-Aldrich | 99.5       | C <sub>10</sub> H <sub>16</sub>                | 136.1252        | 4.321±0.237 | N/A        |    | EtOH    |
| A-TERPINEOL                  | Sigma-Aldrich | 98         | C <sub>10</sub> H <sub>18</sub> O              | 154.1358        | 2.708±0.236 | 15.09±0.29 |    | EtOH    |
| B-CARYOPHYLLENE              | Sigma-Aldrich | N/A        | C <sub>15</sub> H <sub>24</sub>                | 204.1878        | 6.416±0.248 | N/A        |   | EtOH    |
| BETULINIC ACID               | Sigma-Aldrich | ≥99.3      | C <sub>30</sub> H <sub>48</sub> O <sub>3</sub> | 456.3603        | 7.38        | 4.75       |  | MeOH    |

| ANALYTE               | VENDOR          | PURITY [%] | FORMULA           | EXACT MASS [DA] | LOG P       | PKA       | STRUCTURE                                                                             | SOLVENT          |
|-----------------------|-----------------|------------|-------------------|-----------------|-------------|-----------|---------------------------------------------------------------------------------------|------------------|
| <b>OLEANOLIC ACID</b> | Sigma-Aldrich   | ≥99.9      | $C_{30}H_{48}O_3$ | 456.3603        | 7.47        | X         | 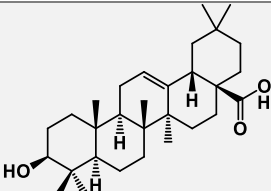   | MeOH/ACN (50/50) |
| <b>URSOLIC ACID</b>   | MedChem Express | ≥98        | $C_{30}H_{48}O_3$ | 456.3603        | 7.33        | 4.74      |    | MeOH/ACN (50/50) |
| <b>APIGENIN</b>       | Sigma-Aldrich   | 99         | $C_{15}H_{10}O_5$ | 270.0528        | 2.127±0.452 | 6.53±0.40 |    | MeOH/ACN (50/50) |
| <b>CAFFEIC ACID</b>   | Sigma-Aldrich   | 99.4       | $C_9H_8O_4$       | 180.0423        | 0.663±0.286 | 4.58±0.10 |    | MeOH/ACN (50/50) |
| <b>CATECHIN</b>       | Sigma-Aldrich   | 99         | $C_{15}H_{14}O_6$ | 290.0790        | 0.610±0.454 | 9.54±0.10 |   | ACN              |
| <b>ELLAGIC ACID</b>   | Sigma-Aldrich   | 97.4       | $C_{14}H_6O_8$    | 302.0063        | 0.239±1.553 | 5.02±0.20 |  | MeOH             |

| ANALYTE      | VENDOR          | PURITY [%] | FORMULA                                         | EXACT MASS [DA] | LOG P            | PKA       | STRUCTURE                                                                             | SOLVENT          |
|--------------|-----------------|------------|-------------------------------------------------|-----------------|------------------|-----------|---------------------------------------------------------------------------------------|------------------|
| EPICATECHIN  | Sigma-Aldrich   | 96.1       | C <sub>15</sub> H <sub>14</sub> O <sub>6</sub>  | 290.0790        | 0.610±0.454      | 9.54±0.10 | 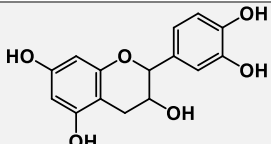   | MeOH/ACN (50/50) |
| GALLIC ACID  | Sigma-Aldrich   | 100        | C <sub>7</sub> H <sub>6</sub> O <sub>5</sub>    | 170.0215        | 0.531±0.325      | 4.33±0.10 |    | MeOH/ACN (50/50) |
| HESPERETIN   | Sigma-Aldrich   | 99         | C <sub>16</sub> H <sub>6</sub> O <sub>6</sub>   | 304.0947        | 1.938±0.471      | 7.49±0.40 |    | MeOH             |
| HESPERIDIN   | Sigma-Aldrich   | 95.9       | C <sub>28</sub> H <sub>34</sub> O <sub>15</sub> | 610.1898        | -<br>1.212±0.819 | 7.15±0.40 |    | MeOH             |
| HIRSUTRIN    | MedChem Express |            | C <sub>21</sub> H <sub>20</sub> O <sub>12</sub> | 464.0955        | -<br>0.111±1.370 | 6.17±0.40 |   | MeOH             |
| ISORHAMNETIN | Extrasynthese   | ≥99        | C <sub>16</sub> H <sub>12</sub> O <sub>7</sub>  | 316.0583        | 2.787±0.822      | 6.31±0.40 |  | MeOH             |

| ANALYTE             | VENDOR          | PURITY [%] | FORMULA                                         | EXACT MASS [DA] | LOG P            | PKA       | STRUCTURE                                                                             | SOLVENT          |
|---------------------|-----------------|------------|-------------------------------------------------|-----------------|------------------|-----------|---------------------------------------------------------------------------------------|------------------|
| KAEMPFEROL          | Sigma-Aldrich   | 97.8       | C <sub>15</sub> H <sub>10</sub> O <sub>6</sub>  | 286.0477        | 2.685±0.812      | 6.34±0.40 | 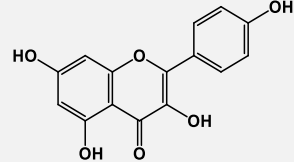   | MeOH/ACN (50/50) |
| LUTEOLIN            | Sigma-Aldrich   | 99.4       | C <sub>15</sub> H <sub>10</sub> O <sub>6</sub>  | 286.0477        | 2.695±0.554      | 6.50±0.40 |    | MeOH/ACN (50/50) |
| NARINGENIN          | Sigma-Aldrich   | 98.9       | C <sub>15</sub> H <sub>12</sub> O <sub>5</sub>  | 272.0685        | 2.628±0.406      | 7.52±0.40 |    | ACN              |
| PHLORIDZIN          | Sigma-Aldrich   | 99         | C <sub>21</sub> H <sub>24</sub> O <sub>10</sub> | 436.1369        | -<br>0.365±0.385 | 7.15±0.40 |    | MeOH/ACN (50/50) |
| PROTOCATECHUIC ACID | Sigma-Aldrich   | 99.9       | C <sub>7</sub> H <sub>6</sub> O <sub>4</sub>    | 154.0266        | 1.010±0.237      | 4.45±0.10 |   | ACN              |
| QUERCETIN           | MedChem Express | ≥98        | C <sub>15</sub> H <sub>10</sub> O <sub>7</sub>  | 302.0427        | 1.989±1.075      | 6.31±0.40 |  | MeOH             |

| ANALYTE     | VENDOR          | PURITY [%] | FORMULA                                         | EXACT MASS [DA] | LOG P            | PKA       | STRUCTURE                                                                            | SOLVENT |
|-------------|-----------------|------------|-------------------------------------------------|-----------------|------------------|-----------|--------------------------------------------------------------------------------------|---------|
| QUERCITRIN  | MedChem Express | 99.24      | C <sub>21</sub> H <sub>20</sub> O <sub>12</sub> | 448.1006        | 0.579±1.358      | 6.17±0.40 | 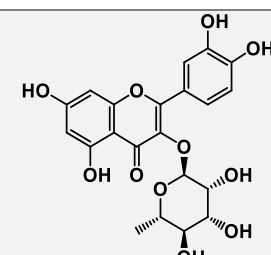  | MeOH    |
| RUTIN       | Extrasynthese   | ≥99        | C <sub>27</sub> H <sub>30</sub> O <sub>16</sub> | 610.1534        | -<br>0.903±1.416 | 6.17±0.40 |   | MeOH    |
| TAMARIXETIN | Extrasynthese   | ≥98        | C <sub>16</sub> H <sub>12</sub> O <sub>7</sub>  | 316.0583        | 2.670±0.822      | 6.31±0.40 |   | MeOH    |
| TAXIFOLIN   | MedChem Express | ≥99.5      | C <sub>15</sub> H <sub>12</sub> O <sub>7</sub>  | 304.0583        | 1.569±0.555      | 7.39±0.60 |  | ACN     |

**Table S2: List of conditions tested in the SFE optimization using the Box-Behnken design of experiments. Ethanol was used as a co-solvent.**

| <b>Experiment</b> | <b>Run order</b> | <b>Cosolvent amount</b> | <b>Water [vol%]</b> | <b>Temperature [°C]</b> | <b>Pressure [bar]</b> |
|-------------------|------------------|-------------------------|---------------------|-------------------------|-----------------------|
| <b>N1</b>         | 10               | 2                       | 0                   | 60                      | 210                   |
| <b>N2</b>         | 24               | 95                      | 0                   | 60                      | 210                   |
| <b>N3</b>         | 23               | 2                       | 20                  | 60                      | 210                   |
| <b>N4</b>         | 3                | 95                      | 20                  | 60                      | 210                   |
| <b>N5</b>         | 26               | 48.5                    | 10                  | 40                      | 100                   |
| <b>N6</b>         | 15               | 48.5                    | 10                  | 80                      | 100                   |
| <b>N7</b>         | 6                | 48.5                    | 10                  | 40                      | 320                   |
| <b>N8</b>         | 27               | 48.5                    | 10                  | 80                      | 320                   |
| <b>N9</b>         | 1                | 2                       | 10                  | 60                      | 100                   |
| <b>N10</b>        | 18               | 95                      | 10                  | 60                      | 100                   |
| <b>N11</b>        | 2                | 2                       | 10                  | 60                      | 320                   |
| <b>N12</b>        | 8                | 95                      | 10                  | 60                      | 320                   |
| <b>N13</b>        | 22               | 48.5                    | 0                   | 40                      | 210                   |
| <b>N14</b>        | 4                | 48.5                    | 20                  | 40                      | 210                   |
| <b>N15</b>        | 7                | 48.5                    | 0                   | 80                      | 210                   |
| <b>N16</b>        | 16               | 48.5                    | 20                  | 80                      | 210                   |
| <b>N17</b>        | 5                | 2                       | 10                  | 40                      | 210                   |
| <b>N18</b>        | 21               | 95                      | 10                  | 40                      | 210                   |
| <b>N19</b>        | 14               | 2                       | 10                  | 80                      | 210                   |
| <b>N20</b>        | 13               | 95                      | 10                  | 80                      | 210                   |
| <b>N21</b>        | 17               | 48.5                    | 0                   | 60                      | 100                   |
| <b>N22</b>        | 20               | 48.5                    | 20                  | 60                      | 100                   |
| <b>N23</b>        | 19               | 48.5                    | 0                   | 60                      | 320                   |
| <b>N24</b>        | 11               | 48.5                    | 20                  | 60                      | 320                   |
| <b>N25</b>        | 9                | 48.5                    | 10                  | 60                      | 210                   |
| <b>N26</b>        | 25               | 48.5                    | 10                  | 60                      | 210                   |
| <b>N27</b>        | 12               | 48.5                    | 10                  | 60                      | 210                   |



**Table S3: List of conditions tested in SFE optimization using Box-Behnken design of experiments. Hexane was used as a co-solvent.**

| <b>Experiment</b> | <b>Run order</b> | <b>Cosolvent amount</b> | <b>Temperature [°C]</b> | <b>Pressure [bar]</b> |
|-------------------|------------------|-------------------------|-------------------------|-----------------------|
| <b>N1</b>         | 4                | 0                       | 40                      | 210                   |
| <b>N2</b>         | 10               | 10                      | 40                      | 210                   |
| <b>N3</b>         | 5                | 0                       | 80                      | 210                   |
| <b>N4</b>         | 6                | 10                      | 80                      | 210                   |
| <b>N5</b>         | 14               | 0                       | 60                      | 100                   |
| <b>N6</b>         | 11               | 10                      | 60                      | 100                   |
| <b>N7</b>         | 13               | 0                       | 60                      | 320                   |
| <b>N8</b>         | 2                | 10                      | 60                      | 320                   |
| <b>N9</b>         | 12               | 5                       | 40                      | 100                   |
| <b>N10</b>        | 3                | 5                       | 80                      | 100                   |
| <b>N11</b>        | 9                | 5                       | 40                      | 320                   |
| <b>N12</b>        | 15               | 5                       | 80                      | 320                   |
| <b>N13</b>        | 8                | 5                       | 60                      | 210                   |
| <b>N14</b>        | 1                | 5                       | 60                      | 210                   |
| <b>N15</b>        | 7                | 5                       | 60                      | 210                   |

Table S4: The suggested optimized conditions proposed by MODDE for the further optimization and final selection of the key parameters. Conditions in bold were suggested by the MODDE optimizer as the most suitable one. The conditions marked in orange were finally selected for the evaluation of the kinetic study.

| Target analytes       | Cosolvent   | Cosolvent amount [%, v/v] | Water amount in cosolvent [%, v/v] | Temperature [°C] | Pressure [bar] | Probability of failure [%] |
|-----------------------|-------------|---------------------------|------------------------------------|------------------|----------------|----------------------------|
| volatile terpenes     | hexane      | <b>8</b>                  | <b>0</b>                           | <b>45</b>        | <b>221</b>     | <b>25</b>                  |
| volatile terpenes     | EtOH        | 2                         | 4                                  | 80               | 178            | 5                          |
| volatile terpenes     | EtOH        | 2                         | 0                                  | 76               | 268            | 4.9                        |
| volatile terpenes     | EtOH        | 4                         | 0                                  | 79               | 313            | 5.4                        |
| volatile terpenes     | EtOH        | 2                         | 9                                  | 80               | 159            | 9                          |
| volatile terpenes     | <b>EtOH</b> | <b>2</b>                  | <b>3</b>                           | <b>78</b>        | <b>133</b>     | <b>8.6</b>                 |
| terpenoic acids       | <b>EtOH</b> | <b>86</b>                 | <b>2</b>                           | <b>76</b>        | <b>122</b>     | <b>0.64</b>                |
| terpenoic acids       | EtOH        | 64                        | 1                                  | 44               | 102            | 0.8                        |
| terpenoic acids       | EtOH        | 89                        | 1                                  | 55               | 190            | 0.94                       |
| phenolic acids        | EtOH        | 74                        | 12                                 | 80               | 320            | 9.3                        |
| phenolic acids        | <b>EtOH</b> | <b>44</b>                 | <b>1</b>                           | <b>80</b>        | <b>108</b>     | <b>10</b>                  |
| phenolic acids        | EtOH        | 69                        | 18                                 | 44               | 318            | 15                         |
| flavonoids            | <b>EtOH</b> | <b>32</b>                 | <b>20</b>                          | <b>42</b>        | <b>108</b>     | <b>35</b>                  |
| flavonoids            | EtOH        | 95                        | 9                                  | 46               | 320            | 44                         |
| flavonoids            | EtOH        | 22                        | 20                                 | 40               | 248            | 51                         |
| <i>polar analytes</i> | <i>EtOH</i> | 93                        | 7                                  | 80               | 320            | 54                         |

**Table S5: Chromatographic conditions of UHPSFC method 2 for the analysis of flavonoids, adopted from Plachká et al.<sup>2</sup>.**

| <b>time (min)</b> | <b>CO<sub>2</sub> (%)</b> | <b>organic modifier (%)</b> | <b>flow rate (mL min<sup>-1</sup>)</b> | <b>BPR psi (bar)</b> |
|-------------------|---------------------------|-----------------------------|----------------------------------------|----------------------|
| 0                 | 100                       | 0                           | 1.5                                    | 1885 (130)           |
| 0.5               | 100                       | 0                           | 1.5                                    | 1885 (130)           |
| 0.7               | 97                        | 3                           | 1.5                                    | 1885 (130)           |
| 5.0               | 96                        | 4                           | 1.5                                    | 1885 (130)           |
| 5.5               | 80                        | 20                          | 1.5                                    | 1885 (130)           |
| 7.0               | 80                        | 20                          | 1.5                                    | 1885 (130)           |
| 8.5               | 77                        | 23                          | 1.5                                    | 1885 (130)           |
| 10.0              | 77                        | 23                          | 1.5                                    | 1885 (130)           |
| 12.0              | 30                        | 70                          | 1.5                                    | 1885 (130)           |
| 13.0              | 10                        | 90                          | 0.7                                    | 1494 (103)           |
| 14.0              | 10                        | 90                          | 0.7                                    | 1494 (103)           |
| 14.5              | 100                       | 0                           | 1.5                                    | 1494 (103)           |
| 15.0              | 100                       | 0                           | 1.5                                    | 1885 (130)           |
| 15.5              | 100                       | 0                           | 1.5                                    | 1885 (130)           |

**Table S6: SRM transitions selected for each target analyte together along their optimal collision energy. RT – retention time, CE – collision energy, ESI – electrospray ionization, ESCi – multimodal ionization. Adopted from Plachká et al. <sup>2</sup>**

| ANALYTE                    | RT (MIN)      | IONIZATION MODE   | SRM                            | CE (eV) |
|----------------------------|---------------|-------------------|--------------------------------|---------|
| 1,8-CINEOLE (EUCALYPTOL)   | 1.101         | ESCi <sup>+</sup> | 155.3 > 137.2                  | 10      |
| CITRAL                     | 3.175 + 3.525 | ESCi <sup>+</sup> | 153.1 > 71.1                   | 10      |
| CITRONELLAL                | 2.347         | ESCi <sup>+</sup> | 155.3 > 111.2<br>155.3 > 94.97 | 10      |
| CITRONELLOL                | 2.737         | ESCi <sup>+</sup> | 157.3 > 83.1<br>157.3 > 68.8   | 20      |
| EUGENOL                    | 5.242         | ESCi <sup>+</sup> | 164.2 > 149.1<br>164.2 > 132.1 | 10      |
| FENCHONE                   | 1.056         | ESCi <sup>+</sup> | 152.9 > 135.2<br>152.9 > 109.1 | 10      |
| GERANIOL                   | 3.168         | ESCi <sup>+</sup> | 155.3 > 137.3                  | 10      |
| GERANYL ACETATE            | 3.539         | ESCi <sup>+</sup> | 196.2 > 181.2<br>181.2 > 163.2 | 10      |
| LIMONENE                   | 2.590         | ESCi <sup>+</sup> | 136.9                          | x       |
| LINALOOL                   | 1.945         | ESCi <sup>+</sup> | 137.0 > 81.1                   | 10      |
| MENTHOL                    | 1.668         | ESCi <sup>+</sup> | 171.0 > 135.0<br>157.3         | 10      |
| NEROLIDOL A<br>NEROLIDOL B | 4.682 + 4.970 | ESCi <sup>+</sup> | 205.2 > 121.1<br>205.2 > 135.0 | 10      |
| p-CYMENE                   | 2.102         | ESCi <sup>+</sup> | 134.2 > 119.1                  | 10      |
| T-TERPIN                   | 4.756         | ESCi <sup>+</sup> | 136.9 > 81.0                   | 10      |
| α-PINENE                   | 1.02          | ESCi <sup>+</sup> | 137.3                          | x       |
| α-TERPINEOL                | 3.365         | ESCi <sup>+</sup> | 155.3 > 137.3<br>137.3 > 71.1  | 20      |
| β-CARYOPHYLLENE            | 3.499         | ESCi <sup>+</sup> | 205.4 > 149.1<br>205.4 > 121.1 | 10      |
| BETULINIC ACID             | 4.151         | ESI <sup>-</sup>  | 455.4 > 455.4<br>455.4 > 407.1 | 10      |
| OLEANOLIC ACID             | 4.32          | ESI <sup>-</sup>  | 455.4 > 455.4<br>455.4 > 407.1 | 10      |
| URSOLIC ACID               | 4.589         | ESI <sup>-</sup>  | 455.4 > 455.4<br>455.4 > 407.1 | 10      |
| APIGENIN                   | 6.450         | ESI <sup>-</sup>  | 268.9 > 224.9<br>268.9 > 200.9 | 20      |
| CAFFEIC ACID               | 6.621         | ESI <sup>-</sup>  | 178.9 > 135.0                  | 20      |
| CATECHIN                   | 10.398        | ESI <sup>-</sup>  | 289.3 > 203.2<br>289.3 > 178.9 | 20      |
| ELLAGIC ACID               | 7.771         | ESI <sup>-</sup>  | 301.0 > 163.1                  | 10      |
| EPICATECHIN                | 10.171        | ESI <sup>-</sup>  | 289.3 > 203.2<br>289.3 > 178.9 | 5       |
| GALLIC ACID                | 7.965         | ESI <sup>-</sup>  | 168.9 > 124.9                  | 10      |
| HESPERETIN                 | 6.201         | ESI <sup>-</sup>  | 301.0 > 241.9<br>301.0 > 199.1 | 20      |
| HESPERIDIN                 | 10.771        | ESI <sup>-</sup>  | 609.2 > 301.0                  | 20      |
| HIRSUTRIN                  | 10.822        | ESI <sup>-</sup>  | 462.9 > 300.0                  | 30      |
| ISORHAMNETIN               | 6.576         | ESI <sup>-</sup>  | 315.1 > 299.9<br>315.1 > 271.0 | 20      |
| KAEMPFEROL                 | 6.851         | ESI <sup>-</sup>  | 285.2 > 150.9<br>285.2 > 228.9 | 30      |
| LUTEOLIN                   | 7.003         | ESI <sup>-</sup>  | 285.2 > 175.0<br>285.2 > 199.0 | 30      |
| NARINGENIN                 | 6.391         | ESI <sup>-</sup>  | 270.9 > 150.8<br>270.9 > 177.1 | 20      |
| PHLORIDZIN                 | 10.047        | ESI <sup>-</sup>  | 434.9 > 272.9                  | 20      |
| PROTOCATECHUIC ACID        | 6.634         | ESI <sup>-</sup>  | 153.0 > 108.8                  | 10      |
| QUERCETIN                  | 8.071         | ESI <sup>-</sup>  | 301.0 > 179.0<br>301.0 > 245.0 | 20      |
| QUERCITRIN                 | 10.093        | ESI <sup>-</sup>  | 446.9 > 300.9<br>446.9 > 348.8 | 20      |

|                    |        |      |                                |    |
|--------------------|--------|------|--------------------------------|----|
| <b>RUTIN</b>       | 11.474 | ESI- | 609.2 > 301.0<br>301.0 > 179.2 | 30 |
| <b>TAMARIXETIN</b> | 6.729  | ESI- | 315.1 > 299.9<br>315.1 > 271.0 | 20 |
| <b>TAXIFOLIN</b>   | 7.794  | ESI- | 302.9 > 217.0<br>302.9 > 176.9 | 20 |

Table S7: The extracted amount of target compounds extracted during each extraction step for all extracted plant species expressed in %.

|                        | <i>Corymbia citriodora</i> |        |     | <i>Eucalyptus gunii</i> |        |     | <i>Melaleuca alternifolia</i> |        |     | <i>Cympogon citratus</i> |        |     | <i>Myrtus communis</i> |        |     | <i>Laurus nobilis</i> |        |     | <i>Rosa hybrida</i> |        |     |
|------------------------|----------------------------|--------|-----|-------------------------|--------|-----|-------------------------------|--------|-----|--------------------------|--------|-----|------------------------|--------|-----|-----------------------|--------|-----|---------------------|--------|-----|
|                        | SFE                        | SFE    | UAE | SFE                     | SFE    | UAE | SFE                           | SFE    | UAE | SFE                      | SFE    | UAE | SFE                    | SFE    | UAE | SFE                   | SFE    | UAE | SFE                 | SFE    | UAE |
|                        | step 1                     | step 2 | UAE | step 1                  | step 2 | UAE | step 1                        | step 2 | UAE | step 1                   | step 2 | UAE | step 1                 | step 2 | UAE | step 1                | step 2 | UAE | step 1              | step 2 | UAE |
| <i>caryophyllene</i>   | 100                        | 0      | 0   | 98                      | 2      | 0   | 79                            | 4      | 17  | 0                        | 0      | 0   | 0                      | 0      | 0   | 98                    | 2      | 0   | 100                 | 0      | 0   |
| <i>citral</i>          | 0                          | 0      | 0   | 100                     | 0      | 0   | 0                             | 0      | 0   | 99                       | 1      | 0   | 100                    | 0      | 0   | 100                   | 0      | 0   | 100                 | 0      | 0   |
| <i>citronellal</i>     | 97                         | 3      | 0   | 100                     | 0      | 0   | 51                            | 0      | 49  | 100                      | 0      | 0   | 100                    | 0      | 0   | 0                     | 0      | 0   | 100                 | 0      | 0   |
| <i>citronellol</i>     | 100                        | 0      | 0   | 0                       | 0      | 0   | 48                            | 0      | 52  | 0                        | 0      | 0   | 0                      | 0      | 0   | 0                     | 0      | 0   | 0                   | 0      | 0   |
| <i>cymene</i>          | 0                          | 0      | 0   | 94                      | 6      | 0   | 56                            | 2      | 42  | 97                       | 3      | 0   | 0                      | 0      | 100 | 100                   | 0      | 0   | 0                   | 0      | 0   |
| <i>eucalyptol</i>      | 0                          | 0      | 0   | 97                      | 3      | 0   | 56                            | 0      | 44  | 0                        | 0      | 0   | 0                      | 0      | 0   | 100                   | 0      | 0   | 0                   | 0      | 0   |
| <i>eugenol</i>         | 100                        | 0      | 0   | 100                     | 0      | 0   | 62                            | 1      | 37  | 100                      | 0      | 0   | 81                     | 17     | 2   | 99                    | 1      | 0   | 94                  | 6      | 0   |
| <i>fenchon</i>         | 0                          | 0      | 0   | 98                      | 2      | 0   | 57                            | 0      | 43  | 100                      | 0      | 0   | 0                      | 0      | 0   | 100                   | 0      | 0   | 0                   | 0      | 0   |
| <i>geraniol</i>        | 100                        | 0      | 0   | 0                       | 0      | 0   | 0                             | 0      | 0   | 100                      | 0      | 0   | 0                      | 0      | 0   | 0                     | 0      | 0   | 0                   | 0      | 0   |
| <i>geranyl acetate</i> | 97                         | 3      | 0   | 95                      | 4      | 1   | 77                            | 4      | 19  | 0                        | 0      | 0   | 100                    | 0      | 0   | 0                     | 0      | 0   | 0                   | 0      | 0   |
| <i>limonene</i>        | 89                         | 11     | 0   | 0                       | 0      | 0   | 0                             | 0      | 0   | 0                        | 0      | 0   | 100                    | 0      | 0   | 100                   | 0      | 0   | 0                   | 0      | 0   |
| <i>linalool</i>        | 97                         | 3      | 0   | 0                       | 0      | 0   | 0                             | 0      | 0   | 0                        | 0      | 0   | 0                      | 0      | 0   | 0                     | 0      | 0   | 100                 | 0      | 0   |
| <i>menthol</i>         | 100                        | 0      | 0   | 0                       | 0      | 0   | 0                             | 0      | 0   | 0                        | 0      | 0   | 0                      | 0      | 0   | 0                     | 0      | 0   | 0                   | 0      | 0   |
| <i>nerolidol A</i>     | 95                         | 3      | 2   | 100                     | 0      | 0   | 81                            | 13     | 7   | 78                       | 18     | 4   | 55                     | 35     | 10  | 96                    | 1      | 3   | 47                  | 8      | 44  |
| <i>nerolidol B</i>     | 88                         | 8      | 4   | 85                      | 14     | 1   | 95                            | 4      | 1   | 56                       | 20     | 24  | 51                     | 15     | 35  | 99                    | 1      | 0   | 70                  | 26     | 3   |
| <i>α-pinene</i>        | 100                        | 0      | 0   | 99                      | 0      | 1   | 0                             | 0      | 0   | 0                        | 0      | 0   | 100                    | 0      | 0   | 0                     | 0      | 0   | 0                   | 0      | 0   |
| <i>terpin</i>          | 100                        | 0      | 0   | 100                     | 0      | 0   | 0                             | 0      | 0   | 100                      | 0      | 0   | 100                    | 0      | 0   | 100                   | 0      | 0   | 100                 | 0      | 0   |
| <i>terpineol</i>       | 100                        | 0      | 0   | 0                       | 0      | 0   | 54                            | 0      | 46  | 0                        | 0      | 0   | 0                      | 0      | 0   | 0                     | 0      | 0   | 0                   | 0      | 0   |
| <i>apigenin</i>        | 0                          | 0      | 0   | 0                       | 0      | 0   | 0                             | 0      | 0   | 0                        | 0      | 0   | 0                      | 0      | 0   | 0                     | 0      | 0   | 0                   | 0      | 0   |
| <i>catechin</i>        | 0                          | 65     | 35  | 0                       | 31     | 69  | 0                             | 13     | 87  | 0                        | 0      | 100 | 0                      | 0      | 100 | 0                     | 0      | 0   | 0                   | 0      | 100 |
| <i>epicatechin</i>     | 0                          | 0      | 0   | 0                       | 0      | 0   | 0                             | 100    | 0   | 0                        | 0      | 0   | 0                      | 0      | 0   | 26                    | 29     | 45  | 0                   | 0      | 0   |
| <i>hesperetin</i>      | 0                          | 0      | 0   | 0                       | 0      | 0   | 0                             | 0      | 0   | 0                        | 0      | 0   | 0                      | 0      | 0   | 0                     | 0      | 0   | 0                   | 0      | 0   |
| <i>hesperidin</i>      | 0                          | 0      | 0   | 0                       | 0      | 0   | 0                             | 0      | 0   | 0                        | 0      | 0   | 0                      | 0      | 0   | 0                     | 0      | 0   | 0                   | 0      | 0   |
| <i>hirsutrin</i>       | 0                          | 53     | 47  | 0                       | 38     | 62  | 0                             | 23     | 77  | 0                        | 39     | 61  | 0                      | 27     | 73  | 0                     | 35     | 65  | 0                   | 32     | 68  |
| <i>isorhamnetin</i>    | 0                          | 0      | 0   | 0                       | 0      | 0   | 0                             | 0      | 0   | 0                        | 0      | 0   | 0                      | 0      | 0   | 0                     | 0      | 0   | 0                   | 0      | 100 |
| <i>kaempferol</i>      | 0                          | 0      | 0   | 0                       | 0      | 100 | 0                             | 0      | 100 | 0                        | 0      | 0   | 0                      | 0      | 0   | 0                     | 0      | 0   | 0                   | 100    | 0   |
| <i>luteolin</i>        | 0                          | 0      | 0   | 0                       | 0      | 0   | 0                             | 0      | 100 | 0                        | 0      | 0   | 0                      | 0      | 0   | 0                     | 0      | 0   | 0                   | 0      | 0   |
| <i>naringenin</i>      | 0                          | 0      | 0   | 0                       | 0      | 100 | 0                             | 10     | 90  | 0                        | 0      | 0   | 0                      | 0      | 100 | 0                     | 0      | 0   | 0                   | 100    | 0   |
| <i>phloridzin</i>      | 0                          | 37     | 63  | 0                       | 26     | 74  | 6                             | 25     | 68  | 0                        | 0      | 0   | 0                      | 17     | 83  | 0                     | 30     | 70  | 0                   | 47     | 53  |
| <i>quercetin</i>       | 0                          | 0      | 0   | 0                       | 0      | 100 | 0                             | 23     | 77  | 0                        | 0      | 0   | 0                      | 0      | 0   | 0                     | 0      | 0   | 0                   | 0      | 100 |
| <i>quercitrin</i>      | 0                          | 72     | 28  | 0                       | 50     | 50  | 0                             | 26     | 74  | 0                        | 40     | 60  | 0                      | 18     | 82  | 0                     | 39     | 61  | 0                   | 44     | 56  |
| <i>rutin</i>           | 0                          | 100    | 0   | 0                       | 36     | 64  | 0                             | 100    | 0   | 0                        | 0      | 0   | 0                      | 0      | 0   | 0                     | 31     | 69  | 0                   | 26     | 74  |
| <i>tamarixetin</i>     | 0                          | 0      | 0   | 0                       | 0      | 0   | 0                             | 0      | 0   | 0                        | 0      | 0   | 0                      | 0      | 0   | 0                     | 0      | 0   | 0                   | 0      | 0   |
| <i>taxifolin</i>       | 0                          | 0      | 0   | 0                       | 0      | 0   | 0                             | 0      | 100 | 0                        | 0      | 0   | 0                      | 0      | 0   | 0                     | 0      | 0   | 0                   | 0      | 0   |
| <i>caffeic acid</i>    | 28                         | 39     | 33  | 26                      | 26     | 48  | 0                             | 19     | 81  | 16                       | 57     | 27  | 18                     | 26     | 56  | 39                    | 27     | 34  | 0                   | 43     | 57  |
| <i>ellagic acid</i>    | 0                          | 53     | 47  | 0                       | 0      | 0   | 0                             | 40     | 60  | 0                        | 0      | 0   | 0                      | 0      | 0   | 0                     | 0      | 100 | 0                   | 0      | 0   |

|                                   | <i>Corymbia citriodora</i> |        |     | <i>Eucalyptus gunii</i> |        |     | <i>Melaleuca alternifolia</i> |        |     | <i>Cympogon citratus</i> |        |     | <i>Myrtus communis</i> |        |     | <i>Laurus nobilis</i> |        |     | <i>Rosa hybrida</i> |        |     |
|-----------------------------------|----------------------------|--------|-----|-------------------------|--------|-----|-------------------------------|--------|-----|--------------------------|--------|-----|------------------------|--------|-----|-----------------------|--------|-----|---------------------|--------|-----|
|                                   | SFE                        | SFE    | UAE | SFE                     | SFE    | UAE | SFE                           | SFE    | UAE | SFE                      | SFE    | UAE | SFE                    | SFE    | UAE | SFE                   | SFE    | UAE | SFE                 | SFE    | UAE |
|                                   | step 1                     | step 2 | UAE | step 1                  | step 2 | UAE | step 1                        | step 2 | UAE | step 1                   | step 2 | UAE | step 1                 | step 2 | UAE | step 1                | step 2 | UAE | step 1              | step 2 | UAE |
| <b><i>gallic acid</i></b>         | 0                          | 31     | 69  | 0                       | 15     | 85  | 0                             | 3      | 97  | 0                        | 23     | 77  | 0                      | 3      | 97  | 0                     | 12     | 88  | 0                   | 13     | 87  |
| <b><i>protocatechuic acid</i></b> | 43                         | 23     | 33  | 31                      | 26     | 43  | 7                             | 20     | 73  | 0                        | 54     | 46  | 18                     | 29     | 54  | 55                    | 14     | 31  | 22                  | 36     | 42  |
| <b><i>betulinic acid</i></b>      | 90                         | 6      | 4   | 76                      | 7      | 16  | 35                            | 17     | 47  | 95                       | 2      | 3   | 88                     | 2      | 9   | 91                    | 0      | 9   | 81                  | 3      | 16  |
| <b><i>oleanolic acid</i></b>      | 79                         | 12     | 9   | 66                      | 10     | 24  | 50                            | 11     | 39  | 97                       | 1      | 2   | 76                     | 6      | 18  | 93                    | 0      | 7   | 82                  | 5      | 13  |
| <b><i>ursulic acid</i></b>        | 42                         | 37     | 21  | 58                      | 14     | 27  | 30                            | 16     | 54  | 97                       | 1      | 2   | 48                     | 13     | 39  | 92                    | 3      | 5   | 65                  | 11     | 24  |

## REFERENCES

(1) Lim, J. S.; Lee, Y. Y.; Chun, H. S. *The Journal of Supercritical Fluids* **1994**, 7 (4), 219-230, DOI: [https://doi.org/10.1016/0896-8446\(94\)90009-4](https://doi.org/10.1016/0896-8446(94)90009-4)

(2) Plachká, K.; Pilařová, V.; Kosturko, Š.; Škop, J.; Svec, F.; Nováková, L. *Analytical Chemistry* **2024**, DOI: <https://doi.org/10.1021/acs.analchem.3c03599>
